# Supplementary material
Source: PubMed Central journal article supplement (PMC3433835)
Supplement: NIHMS399755-supplement-01.pdf [file NIHMS399755-supplement-01.pdf]

**Table S1. Genes within mapped homozygous regions of families A3471, F874 and KKESH001-7.** Note that only 1 gene (red) in each family had a homozygous variant that passed Polyphen 1 and 2 scores, segregated within the family, and was absent from >270 controls.

**Family A3471 (2 sibs calculated together):**

| Chr | Start (hg19) | End (hg19) | Size (Mb) | List of genes in the region                                                                                                                                                                                                                                                                                                                                                                                                                                                                                                                                                                                                                                                                                                                                                                                                                                                                                                                                                                                                                                                           |
|-----|--------------|------------|-----------|---------------------------------------------------------------------------------------------------------------------------------------------------------------------------------------------------------------------------------------------------------------------------------------------------------------------------------------------------------------------------------------------------------------------------------------------------------------------------------------------------------------------------------------------------------------------------------------------------------------------------------------------------------------------------------------------------------------------------------------------------------------------------------------------------------------------------------------------------------------------------------------------------------------------------------------------------------------------------------------------------------------------------------------------------------------------------------------|
| 11  | 87,286,975   | 95,192,462 | 7.91      | RAB38, CTC5, GRM5, TYR, NOX4, FOLH1B, TRIM77P, TRIM49, TRIM53P, LOC399940, TRIM64B, TRIM49L1, LOC399939, TRIM64, LOC399940, TRIM53P, TRIM49L2, UBTF1, NAALAD2, CHORDC1, MIR4490, FAT3, MTNR1B, SLC36A4, CCDC67, C11orf75, KIAA1731, SCARNA9, SNORA25, SNORA32, SNORD6, SNORA1, SNORA8, SNORD5, SNORA18, MIR1304, SNORA40, TAF1D, C11orf54, MED17, VSTM5, HEPHL1, PANX1, FOLR4, GPR83, <b>MRE11A</b> , ANKRD49, LOC643037, FUT4, PIWIL4, AMOTL1, CWC15, KDM4D, KDM4DL, SRSF8, ENDD1, SESN3                                                                                                                                                                                                                                                                                                                                                                                                                                                                                                                                                                                             |
| 15  | 67,533,543   | 78,711,803 | 11.18     | AAGAB, IQCH, LOC100506886, C15orf61, MAP2K5, SKOR1, PIAS1, CALML4, CLN6, FEM1B, ITGA11, CORO2B, ANP32A, MIR4312, ANP32A-IT1, MIR548H4, SPESP1, NOX5, LINC00277, GLCE, PAQR5, KIF23, RPLP1, LOC145837, C15orf50, TLE3, MIR629, UACA, LARP6, THAP10, LRRC49, CT62, THSD4, NR2E3, MYO9A, SENP8, GRAMD2, PKM2, PAPP6, CELF6, HEXA, C15orf34, TMEEM202, ARIH1, MIR630, GOLGA6B, HIGD2B, BBS4, ADPGK, LOC100287559, NEO1, HCN4, C15orf60, NPTN, CD276, C15orf59, TBC1D21, LOC100287616, LOXL1, STOML1, PML, GOLGA6A, LOC283731, ISLR2, ISLR, STRA6, CCDC33, CYP11A1, LOC729739, SEMA7A, UBL7, LOC440288, ARID3B, CLK3, EDC3, CYP1A1, CYP1A2, CSK, MIR4513, LMAN1L, CPLX3, ULK3, SCAMP2, MPI, C15orf17, COX5A, RPP25, SCAMP5, PPCDC, C15orf39, GOLGA6C, GOLGA6D, COMMD4, NEL1, MIR631, MAN2C1, SIN3A, PTPN9, SNUPN, IMP3, SNX33, CSPG4, ODF3L1, DNMI1P35, MIR4313, UBE2Q2, FBXO22, FBXO22-AS1, NRG4, C15orf27, ETF4, TYRO3P, ISL2, SCAPER, RCN2, PSTPIP1, TSPAN3, PEAK1, C15orf5, HMG20A, LINGO1, LOC253044, LOC645752, LOC91450, TBC1D2B, SH2D7, CIB2, IDH3A, ACSBG1, DNAJA4, WDR61, CRABP1 |

**Family F874:**

| Chr | Start (hg19) | End (hg19)  | Size (Mb) | List of genes in the region                                                                                                                                                                                                                                                                                                                                                                                                                                                                                                                                                                                                                                                                                                                                                                                                                                                                                                                                                                                                                                                                                                                                                                                                                                                                                                                                                                                                                                                                                                                                                                                                                                                                                                                                                                                                                                                                                                                                                                                                                                                                                                                                                                                                                                                                                                                                                                                                                                                                                                                                                                                                                                                                                                                                                                                                                                                                                                                                                                                                                                                                                                                                                                                                                                                                                                                                                                                                                                                                                                                                                                                                                          |
|-----|--------------|-------------|-----------|------------------------------------------------------------------------------------------------------------------------------------------------------------------------------------------------------------------------------------------------------------------------------------------------------------------------------------------------------------------------------------------------------------------------------------------------------------------------------------------------------------------------------------------------------------------------------------------------------------------------------------------------------------------------------------------------------------------------------------------------------------------------------------------------------------------------------------------------------------------------------------------------------------------------------------------------------------------------------------------------------------------------------------------------------------------------------------------------------------------------------------------------------------------------------------------------------------------------------------------------------------------------------------------------------------------------------------------------------------------------------------------------------------------------------------------------------------------------------------------------------------------------------------------------------------------------------------------------------------------------------------------------------------------------------------------------------------------------------------------------------------------------------------------------------------------------------------------------------------------------------------------------------------------------------------------------------------------------------------------------------------------------------------------------------------------------------------------------------------------------------------------------------------------------------------------------------------------------------------------------------------------------------------------------------------------------------------------------------------------------------------------------------------------------------------------------------------------------------------------------------------------------------------------------------------------------------------------------------------------------------------------------------------------------------------------------------------------------------------------------------------------------------------------------------------------------------------------------------------------------------------------------------------------------------------------------------------------------------------------------------------------------------------------------------------------------------------------------------------------------------------------------------------------------------------------------------------------------------------------------------------------------------------------------------------------------------------------------------------------------------------------------------------------------------------------------------------------------------------------------------------------------------------------------------------------------------------------------------------------------------------------------------|
| 6   | 60,001       | 10,269,064  | 10.38     | DUSP22, IRF4, EXOC2, HUSB1, LOC285768, FOXQ1, FOXF2, FOXC1, GMD5, C6orf195, MYLK4, WRNIP1, SERPINB1, MIR4645, MGC39372, SERPINB9, DKFZP688I152I7, NQO2, LOC401233, RIPK1, BPHL, TUBB2A, LOC100507194, TUBB2B, PSMG4, SLC22A23, C6orf145, FAM50B, PRPF46, C6orf146, C6orf201, EC12, CDYL, RPP40, PPP1R3G, LYRM4, MIR3691, FARS2, NRN1, F13A1, LY86-AS1, LY86, RREB1, SSR1, CAGE1, CAGE1, R1OK1, DSP, SNRNP48, BMP6, TXNDC5, MUTED-TXNDC5, PIP5K1P1, MUTED, EEF1E1-MUTED, EEF1E1, SCARNA27, SLC35B3, LOC100506207, HULC                                                                                                                                                                                                                                                                                                                                                                                                                                                                                                                                                                                                                                                                                                                                                                                                                                                                                                                                                                                                                                                                                                                                                                                                                                                                                                                                                                                                                                                                                                                                                                                                                                                                                                                                                                                                                                                                                                                                                                                                                                                                                                                                                                                                                                                                                                                                                                                                                                                                                                                                                                                                                                                                                                                                                                                                                                                                                                                                                                                                                                                                                                                                |
| 7   | 9,952,849    | 13,986,939  | 4.03      | NDUFA4, PHF14, THSD7A, TMEM106B, VWDE, SCIN, ARL4A, ETV1                                                                                                                                                                                                                                                                                                                                                                                                                                                                                                                                                                                                                                                                                                                                                                                                                                                                                                                                                                                                                                                                                                                                                                                                                                                                                                                                                                                                                                                                                                                                                                                                                                                                                                                                                                                                                                                                                                                                                                                                                                                                                                                                                                                                                                                                                                                                                                                                                                                                                                                                                                                                                                                                                                                                                                                                                                                                                                                                                                                                                                                                                                                                                                                                                                                                                                                                                                                                                                                                                                                                                                                             |
| 8   | 127,063,064  | 128,762,864 | 1.70      | FAM84B, PCAT1, POU5F1B, LOC727677, MYC                                                                                                                                                                                                                                                                                                                                                                                                                                                                                                                                                                                                                                                                                                                                                                                                                                                                                                                                                                                                                                                                                                                                                                                                                                                                                                                                                                                                                                                                                                                                                                                                                                                                                                                                                                                                                                                                                                                                                                                                                                                                                                                                                                                                                                                                                                                                                                                                                                                                                                                                                                                                                                                                                                                                                                                                                                                                                                                                                                                                                                                                                                                                                                                                                                                                                                                                                                                                                                                                                                                                                                                                               |
| 9   | 36,906,780   | 81,096,302  | 44.19     | PAX5, LOC100506710, ZCCHC7, GRHRP, ZBTB5, POLR1E, FBXO10, TOMM5, FRMPD1, RG9MTD3, EXOSC3, DCAF10, MCART1, SHB, ALDH1B1, IGF1BP1, ANKRD18A, FAM201A, CNTNAP3, LOC653501, ZNF658B, FAM75A2, FAM75A1, FAM74A1, FAM75A3, FAM74A3, ZNF658, FAM75A4, MGC21881, KGFPL2, ANKRD20A2, ANKRD20A3, FAM95B1, FOXD4L4, FOXD4L2, AQP7P3, LOC642929, FAM75A6, CNTNAP3B, FAM27C, FAM27A, KGFPL1, FAM74A2, FAM74A4, LOC442421, LOC100133920, AQP7P1, FAM27B, ANKRD20A1, LOC642236, LOC100132352, PGM5P2, LOC440896, FOXD4L6, CBWD6, ANKRD20A4, FOXD4L5, CBWD3, CBWD5, FOXD4L3, LOC572558, PGM5, C9orf71, PIP5K1B, FAM122A, PRKACG, FXN, TJP2, FAM189A2, APBA1, PTAR1, LOC494558, C9orf135, MAMDC2, LOC100507244, LOC100507299, SMC5, KLF9, TRPM3, MIR204, TMEM2, FAM108B1, C9orf85, C9orf57, GDA, ZFAND5, TMC1, ALDH1A1, ANXA1, RORB, TRPM6, C9orf40, C9orf41, C9orf95, OSTF1, MIR548H3, PCSK5, RFK, RPSAP9, GCNT1, PRUNE2, PCA3, FOXB2, LOC100286938, VPS13A, GNA14, GNAQ, CEP7B, PSAT1                                                                                                                                                                                                                                                                                                                                                                                                                                                                                                                                                                                                                                                                                                                                                                                                                                                                                                                                                                                                                                                                                                                                                                                                                                                                                                                                                                                                                                                                                                                                                                                                                                                                                                                                                                                                                                                                                                                                                                                                                                                                                                                                                                                                                                                                                                                                                                                                                                                                                                                                                                                                                                                                               |
| 11  | 99,307,416   | 103,920,105 | 4.61      | CNTN5, ARHGAP42, TMEM133, PGR, TRPC6, MIR3920, ANGPTL5, KIAA1377, C11orf70, YAP1, BIRC3, BIRC2, TMEM123, MMP7, MMP20, MMP27, MMP8, MMP10, LOC100288077, MMP1, MMP3, MMP12, MMP13, DCUN1D5, DYNC2H1, MIR4693, PDGFG, DDI1                                                                                                                                                                                                                                                                                                                                                                                                                                                                                                                                                                                                                                                                                                                                                                                                                                                                                                                                                                                                                                                                                                                                                                                                                                                                                                                                                                                                                                                                                                                                                                                                                                                                                                                                                                                                                                                                                                                                                                                                                                                                                                                                                                                                                                                                                                                                                                                                                                                                                                                                                                                                                                                                                                                                                                                                                                                                                                                                                                                                                                                                                                                                                                                                                                                                                                                                                                                                                             |
| 13  | 80,878,033   | 87,062,889  | 6.18      | SPRY2, SLITRK1, SLITRK6                                                                                                                                                                                                                                                                                                                                                                                                                                                                                                                                                                                                                                                                                                                                                                                                                                                                                                                                                                                                                                                                                                                                                                                                                                                                                                                                                                                                                                                                                                                                                                                                                                                                                                                                                                                                                                                                                                                                                                                                                                                                                                                                                                                                                                                                                                                                                                                                                                                                                                                                                                                                                                                                                                                                                                                                                                                                                                                                                                                                                                                                                                                                                                                                                                                                                                                                                                                                                                                                                                                                                                                                                              |
| 15  | 89,327,344   | 97,069,505  | 7.74      | ACAN, HAPLN3, MFG8, ABHD2, RLBP1, FANCI, POLG, MIR9-3, LOC254559, RHCG, LOC283761, C15orf42, KIF7, PLIN1, PEX11A, WDR93, MESP1, MESP2, ANPEP, AP3S2, C15orf38-AP3S2, C15orf38, ZNF710, IDH2, SEMA4B, CIB1, C15orf58, TLL13, NGRN, GABARAPL3, ZNF774, IQGAP1, CRTCS, BLM, FURIN, FES, MAN2A2, UNC45A, HDDC3, RCCD1, PRC1, VPS33B, SV2B, SLC03A1, ST8SIA2, C15orf32, LOC100144604, FAM174B, ASB9P1, LOC100507217, CHD2, MIR3175, RGMA, MCTP2, LOC400456, LOC145820, MIR1469, NR2F2                                                                                                                                                                                                                                                                                                                                                                                                                                                                                                                                                                                                                                                                                                                                                                                                                                                                                                                                                                                                                                                                                                                                                                                                                                                                                                                                                                                                                                                                                                                                                                                                                                                                                                                                                                                                                                                                                                                                                                                                                                                                                                                                                                                                                                                                                                                                                                                                                                                                                                                                                                                                                                                                                                                                                                                                                                                                                                                                                                                                                                                                                                                                                                     |
| 16  | 27,139,829   | 80,352,195  | 53.21     | JMJD5, NSMCE1, FLJ21408, IL4R, IL21R1, LOC283888, GTF3C1, KIAA0556, GSG1L, XPO6, SBK1, EIF3CL, EIF3C, CLN3, APOBR, IL27, NUPR1, CCDC101, SULT1A2, SULT1A1A, ATXN2L, TUFM, MIR4721, SH2B1, ATP2A1, RABEP2, CD19, NFATC2IP, MIR4517, SPNS1, LAT, RRN3P2, RUNCDC2C, LOC606724, BOLA2B, BOLA2, SLX1B, SLX1A, SLX1B-SULT1A4, SLX1A-SULT1A3, SULT1A3, SULT1A4, LOC388242, LOC613038, LOC440354, SLC7A5P1, SPN, QPRT, C16orf54, ZG16, KIF22, MAZ, PRRT2, C16orf53, MVP, CDIPT, LOC440356, SEZ6L2, ASPHD1, KCTD13, TMEM219, TAOK2, HIRIP3, INO80E, DOC2A, C16orf92, FAM57B, ALDOA, PPP4C, TBX6, YPEL3, GDDP3, MAPK3, LOC100271831, CORO1A, LOC613037, LOC595101, CD2BP2, TBC1D10B, MYLPP, 1-Sep, ZNF48, ZNF771, DCTPP1, SEPHS2, ITGAL, MIR4518, ZNF768, ZNF747, ZNF764, ZNF688, ZNF785, ZNF689, PRR14, FBRS, SRCAP, SNORA30, PHKG2, C16orf93, RNF40, ZNF629, MIR4519, BCL7C, MIR762, CTF1, FBXL19-AS1, FBXL19, ORAI3, SETD1A, HSD3B7, STX1B, STX4, ZNF668, ZNF646, PRSS53, VKORC1, BCKDK, KAT8, PRSS8, PRSS36, FUS, PYCARD, TRIM27, PYDC1, ITGAM, ITGAX, ITGAD, COX6A2, ZNF843, ARMC5, TGFBI1, SLC5A2, C16orf58, AHSP, CSDAP1, KIAA0664L3, ZNF720, ZNF267, HERC2P4, LOC729264, LOC330705, TP53TG3, SLC6A10P, LOC653550, TP53TG3B, LINC00273, UBE2MP1, LOC283914, LOC146481, LOC100130700, FLJ26245, ANKRD28P1, SHCBP1, VPS35, ORC6, MYLK3, C16orf87, GPT2, DNAJA2, NETO2, ITFG1, PHKB, ABCC12, ABCC11, MIR548E2, LONP2, LOC100507577, SIAH1, N4BP1, CBLN1, C16orf78, <b>ZNF423</b> , TMEM188, HEATR3, PAPDS, ADCY7, BRD7, NKD1, SNX20, NOD2, CYLD, SALL1, LOC388276, LOC100505619, TOX3, LOC643714, CHD9, LOC643802, RBL2, AKTIP, RPRGRI1P, FTO, IRX3, CRNDE, IRX5, IRX6, MMP2, LPTA2, CAPNS2, SLC6A2, CES1P2, CES1P1, CES1, CESSA, LOC283856, GNAO1, DKFZP434H168, MIR3935, AMFR, NUDT21, OGFD01, BBS2, MT4, MT3, MT2A, MT1L, MT1M, MT1J, MT1P, MT1A, MT1D, MT1B, MT1F, MT1G, MT1H, MT1I, MT1X, NUP93, MIR138-2, SLC12A3, HERPUD1, CETP, NLRCS, CPN2E, FAM192A, RSPRY1, ARL2BP, PLLP, CCL22, CX3CL1, CCL17, CIAPIN1, COO9, POLR2C, DOK4, CCDC102A, GPR114, GPR56, GPR97, CCDC135, KATNB1, KIFC3, CNGB1, TEPP, ZNF319, C16orf57, MMP15, C16orf80, CSNK2A2, CCDC113, PRSS54, GINS3, NDRG4, SETD6, CNOT1, SNORA46, SNORA50, SLC38A7, G0T2, LOC644649, CDH8, CDH11, LOC283867, CDH5, BEAN1, TK2, CKLF, CKLF-CMTM1, CMTM1, CMTM2, CMTM3, CMTM4, DYNC1L2, CCDC79, NAE1, CA7, PDP2, CDH16, RRAD, FAM96B, CES2, CES3, CES4A, CBF6, C16orf70, B3GNT9, TRADD, FBXL8, HSF4, NOL3, KIAA0895L, EXOC3L1, E2F4, ELMO3, MIR328, LRRC29, TMEM208, FHOD1, SLC9A5, PLEKHG4, KCTD19, LRRC36, TPPP3, ZDHHC7, HSD11B2, ATP6VD01, AGRP, FAM65A, CTCF, RLTPR, ACD, PARD6A, C16orf48, C16orf86, GFOD2, RANBP10, TSNAXIP1, CENPT, THAP11, NUTF2, EDC4, NRN1L, PSKH1, CTRL, PSMB10, LCAT, SLC12A4, DPEP3, DPEP2, DDX28, DUS2L, NFATC3, ESRP2, PLA2G15, SLC7A6, SLC7A6OS, PRMT7, SMPD3, ZFP90, CDH3, CDH1, TMC07, HAS3, CHTF8, CIRH1A, SNTB2, VPS4A, COG8, PDF, NIP7, TMED6, TERF2, CYB5B, MIR1538, NFAT5, NQO1, NOB1, WWP2, MIR140, CLEC18A, PDXC2P, MIR1972-1, MIR1972-2, PDPR, CLEC18C, LOC729513, EXOSC6, AARS, DDX19B, LOC100506083, DDX19B, ST3GAL2, FUK, COG4, SF3B3, SNORD111B, SNORD111, IL34, MTSS1L, VAC14, LOC100130894, HYDIN, FTSJD1, CALB2, ZNF23, ZNF19, CHST4, TAT, MARVELD3, PHLPP2, SNORA70D, AP1G1, SNORD71, ATXN1L, ZNF821, IST1, PKD1L3, DHODH, HP, HPR, TXNL4B, DHX38, PMFBP1, ZFHX3, HTA, LOC100506172, PSMDD7, LOC283922, CLEC18B, GLG1, RFWD3, MLKL, FA2H, WDR59, ZNRF1, LDHD, ZFP1, CTRB2, CTRB1, BCAR1, CFPD1, TMEM170A, CHST6, CHST5, TMEM231, GABARAPL2, ADAT1, KARS, TERF2IP, CNTNAP4, MIR4719, MON1B, SYCE1L, ADAMTS18, NUDT7, VAT1L, CLEC3A, WWOX, MAF |
| 18  | 65,627,833   | 73,086,805  | 7.46      | TMX3, CCDC102B, DOK6, CD226, RTTN, SOCS6, LOC100505776, CBLN2, NETO1, LOC400655, LOC100505817, FBXO15, C18orf55, CYB5A, C18orf63, FAM69C, CNDP2, CNDP1, LOC400657, ZNF407, ZADH2, TSHZ1                                                                                                                                                                                                                                                                                                                                                                                                                                                                                                                                                                                                                                                                                                                                                                                                                                                                                                                                                                                                                                                                                                                                                                                                                                                                                                                                                                                                                                                                                                                                                                                                                                                                                                                                                                                                                                                                                                                                                                                                                                                                                                                                                                                                                                                                                                                                                                                                                                                                                                                                                                                                                                                                                                                                                                                                                                                                                                                                                                                                                                                                                                                                                                                                                                                                                                                                                                                                                                                              |

**Family KKESH001-7:**

| Chr | Start (hg19) | End (hg19) | Size (Mb) | List of genes in the region                                                                                                                                                                                                                                                                                                                                                                                                                                                                                                                                                                                                                                                                                                                                                                                                                                                                                                                                                                                                                                                                                                                                                                                                                                                                                                                                                                                                                                  |
|-----|--------------|------------|-----------|--------------------------------------------------------------------------------------------------------------------------------------------------------------------------------------------------------------------------------------------------------------------------------------------------------------------------------------------------------------------------------------------------------------------------------------------------------------------------------------------------------------------------------------------------------------------------------------------------------------------------------------------------------------------------------------------------------------------------------------------------------------------------------------------------------------------------------------------------------------------------------------------------------------------------------------------------------------------------------------------------------------------------------------------------------------------------------------------------------------------------------------------------------------------------------------------------------------------------------------------------------------------------------------------------------------------------------------------------------------------------------------------------------------------------------------------------------------|
| 1   | 30,581,567   | 43,171,822 | 12.59     | MATN1, LOC100129196, LAPTM5, MIR4420, SDC3, PUM1, SNORD103A, SNORD103B, SNORD85, PRO0611, NKAIN1, SNRNP40, ZCCHC17, FABP3, SERINC2, LOC149086, LOC284551, TINAGL1, HCRTR1, PEF1, COL16A1, BAI2, MIR4254, SPOCD1, PTP4A2, KHDRBS1, TMEM39B, KPNIA6, TXLNA, CCDC28B, IQCC, CCDC2B, TMEM234, EIF3I, MTMR9LP, FAM167B, LCK, HDAC1, MARCKSL1, LOC100128071, TSSK3, BSDC1, ZBTB88, ZBTB8A, ZBTB80S, RBBP4, SYNC, KIAA1522, YARS, S100PBP, FNDCC5, HPCA, TMEM54, RNF19B, AK2, ADC, TRIM62, ZNF362, PHC2, MIR3605, ZSCAN20, CSMD2, HMG84, LOC402779, C1orf94, GJB5, GJB4, GJB3, GJA4, C1orf121, DLGAP3, LOC653160, ZMYM6NB, ZMYM6, ZMYM1, SFPO, ZMYM4, KIAA0319L, NCDN, TFAP2E, PSMB2, C1orf126, CLSPN, EIF2C4, EIF2C1, EIF2C3, TEK2, ADPRHL2, COL8A2, TRAPP3C, MAP7D1, THRAPP3, SH3D21, FAM176B, STK40, LSM10, OSCP1, MRPS15, CSF3R, GRIK3, MIR4255, LOC728431, ZC3H12A, MEAF6, SINP1, DNALI1, HNTA, RSP01, C1orf109, CDCAB, EPHA10, MANEAL, YRDC, C1orf122, MTF1, INPP5B, SF3A3, FHL3, UTP11L, POU3F1, MIR3659, LOC339442, RRAGC, GJA9-MYCBP, GJA9, MYCBP, RHBDL2, AKRIN1, NDUFS5, MACF1, KIAA0754, BMP8A, PPIEL, PABPC4, SNORA55, HEYL, NTSICA1, HPCAL4, PPIE, BMP8B, OXC72, TRIT1, MYCL1, MFSDD2A, CAP1, PPT1, RLF, TMC02, ZMPSTE24, COL9A2, SMAP2, ZNF643, ZNF642, DEM1, ZNF684, RIMS3, LOC100130557, NFYC, MIR30E, MIR30C1, KCNQ4, CITED4, CTPS, LOC100507178, SLFN1L, SCMH1, EDN2, HIVEP3, GUCAC2B, GUCAC2A, FOXJ3, RIMKLA, ZMYND12, PCCS, CCDC30, PPIH, YBX1 |



|    |            |            |       |                                                                                                                                                                                                                                                                                                                                                                                                                                                                                                                                                                                                                                                                                                                                                                                                                                                                                                                                                                                                                                                                                                                                                                                                                                                                                                                                                                                                                                                                                                                                                                                                                                                                                                                                                                                                                                                                                                                                                                                                                                                                                                                                                                                                                                                                                                                                                                                                                                                                                                                                                                                                                                                                                                                                                                                                                                                                                                                                                                                                                                                                                                                                                                                                                                                                                                                                                                                                                                                                                |
|----|------------|------------|-------|--------------------------------------------------------------------------------------------------------------------------------------------------------------------------------------------------------------------------------------------------------------------------------------------------------------------------------------------------------------------------------------------------------------------------------------------------------------------------------------------------------------------------------------------------------------------------------------------------------------------------------------------------------------------------------------------------------------------------------------------------------------------------------------------------------------------------------------------------------------------------------------------------------------------------------------------------------------------------------------------------------------------------------------------------------------------------------------------------------------------------------------------------------------------------------------------------------------------------------------------------------------------------------------------------------------------------------------------------------------------------------------------------------------------------------------------------------------------------------------------------------------------------------------------------------------------------------------------------------------------------------------------------------------------------------------------------------------------------------------------------------------------------------------------------------------------------------------------------------------------------------------------------------------------------------------------------------------------------------------------------------------------------------------------------------------------------------------------------------------------------------------------------------------------------------------------------------------------------------------------------------------------------------------------------------------------------------------------------------------------------------------------------------------------------------------------------------------------------------------------------------------------------------------------------------------------------------------------------------------------------------------------------------------------------------------------------------------------------------------------------------------------------------------------------------------------------------------------------------------------------------------------------------------------------------------------------------------------------------------------------------------------------------------------------------------------------------------------------------------------------------------------------------------------------------------------------------------------------------------------------------------------------------------------------------------------------------------------------------------------------------------------------------------------------------------------------------------------------------|
| 19 | 48,317,892 | 56,863,306 | 8.55  | <p>CRX, SULT2A1, SNAR-A3, SNAR-A4, SNAR-A5, SNAR-A7, SNAR-A11, SNAR-A9, SNAR-A6, SNAR-A8, SNAR-A10, SNAR-A14, SNAR-A1, SNAR-A2, SNAR-C4, SNAR-A12, SNAR-A13, SNAR-C3, SNAR-C2, SNAR-C5, SNAR-C1, BSPH1, ELSBPB1, CABP5, PLA2G4C, LIG1, CARD8, LOC100505812, ZNF114, CCDC114, EMP3, TMEM143, SYNGR4, KDELR1, GRIN2D, GRWD1, KCNU14, CYTH2, LMTK3, SULT2B1, FAM83E, SPACA4, RPL18, SPHK2, DBP, CA11, SEC1, NTN5, FUT2, MAMSTR, RASIP1, IZUMO1, FUT1, FGF21, BCAT2, HSD17B14, PLEKHA4, PPP1R15A, TULP2, NUCB1, DHDH, BAX, FTL, GYS1, RUVBL2, LHB, CGB, SNAR-G2, CGB2, CGB1, SNAR-G1, CGB5, CGB8, CGB7, NTF4, KCNA7, SNRNP70, LIN7B, C19orf73, PPIA3, HRC, TRPM4, SLC6A16, MIR4324, CD37, TEAD2, DKK1, CCDC155, PTH2, LOC100507003, SLC17A7, PIH1D1, ALDH16A1, FLT3LG, RPL13A, RPL13AP5, SNORD32A, SNORD33, SNORD34, SNORD35A, RPS11, SNORD35B, MIR150, FCGRT, RCN3, NOSIP, PRRG2, PRR12, RRAS, SCAF1, IRF3, BCL2L12, PRMT1, C19orf76, CPT1C, TSKS, AP2A1, FUZ, MED25, LOC100506033, PTOV1, MIR4749, PINKP, AKT1S1, TBC1D17, MIR4750, IL4I1, NUP62, ATF5, MIR4751, SIGLEC11, SIGLEC16, VRK3, ZNF473, FLJ26850, SNAR-B2, SNAR-B1, SNAR-D, IZUMO2, MYH14, KCNC3, NAPS8, NAPS4, NR1H2, POLD1, SPIB, MYBPC2, FAM71E1, C19orf63, JOSD2, ASPDH, LRRC4B, SNAR-F, SYT3, C19orf81, SHANK1, CLEC11A, GPR32, ACPT, C19orf48, SNORD88B, SNORD88A, SNORD88C, MGC45922, KLK1, KLK15, KLK3, KLK2, KLKP1, KLK4, KLK5, KLK6, KLK7, KLK8, KLK9, KLK10, KLK11, KLK12, KLK13, KLK14, CTU1, SIGLEC9, SIGLEC7, SIGLECP3, CD33, C19orf75, IGLON5, VSIG10L, ETFB, CLDN2, NKG7, LIM2, LOC147646, SIGLEC10, LOC100129083, SIGLEC8, CEACAM18, SIGLEC12, SIGLEC6, ZNF175, FLJ30403, SIGLEC5, SIGLEC14, MIR99B, MIRLETTE, MIR125A, LINC00085, HAS1, FPR1, FPR2, FPR3, ZNF577, ZNF649, ZNF613, ZNF350, ZNF615, ZNF614, ZNF432, ZNF841, ZNF616, ZNF836, PPP2R1A, ZNF766, MIR643, ZNF480, ZNF610, ZNF880, ZNF528, ZNF534, ZNF578, ZNF808, ZNF701, ZNF137P, ZNF83, ZNF611, ZNF600, ZNF28, ZNF468, ZNF320, ZNF816-ZNF321P, ZNF321P, ZNF816, ZNF702P, ERVV-1, ERVV-2, ZNF160, ZNF415, ZNF347, ZNF665, ZNF677, VN1R2, VN1R4, LOC646508, BIRC8, ZNF845, ZNF525, ZNF765, LOC147804, ZNF761, ZNF813, ZNF331, LOC284379, DPRX, MIR512-2, MIR512-1, MIR1323, MIR498, MIR520E, MIR519E, MIR520F, MIR515-1, MIR515-2, MIR519C, MIR1283-1, MIR520A, MIR526B, MIR519B, MIR525, MIR523, MIR518F, MIR520B, MIR518B, MIR526A1, MIR520C, MIR518C, MIR524, MIR517A, MIR519D, MIR521-2, MIR520D, MIR517B, MIR520G, MIR516B2, MIR526A2, MIR518E, MIR518A1, MIR518D, MIR516B1, MIR518A2, MIR517C, MIR520H, MIR521-1, MIR522, MIR519A1, MIR527, MIR516A1, MIR1283-2, MIR516A2, MIR519A2, MIR371, MIR371B, MIR372, MIR373, NLRP12, MYADM, PRKCG, CACNG7, CACNG8, MIR935, CACNG6, VSTM1, TARM1, OSCAR, NDUFA3, TFPT, PRPF31, CNOT3, LENG1, TMC4, MBOAT7, TSEN34, RPS9, LILRB3, LILRA6, LILRB5, LILRB2, MIR4752, LILRA3, LILRA5, LILRA4, LAIR1, TTYH1, LENG8, LENG9, CDC42EP5, LAIR2, KIR3DX1, LILRA2, LILRA1, LILRB1, LILRB4, LILRP2, KIR3DL3, KIR2DL3, KIR2DL1, KIR2DL4, KIR3DL1, KIR2DS4, KIR3DL2, FCAR, NCR1, NLRP7, NLRP2, GP6, RDH13, EPS8L1, PPP1R12C, TNNT1, TNNT3, C19orf51, SYT5, PTPRH, TMEM86B, PPP6R1, HSPBP1, BRSK1, TMEM150B, SUV420H2, COX6B2, FAM71E2, IL11, TMEM190, TMEM238, RPL28, UBE2S, SHISA7, ISOC2, ZNF628, NAT14, SSC5D, SBK2, SGK110, ZNF579, FIZ1, ZNF524, ZNF685, ZNF784, ZNF580, ZNF581, CCDC106, U2AF2, EPN1, NLRP9, RFLP4A, NLRP11, NLRP4, NLRP13, NLRP8, NLRP5, ZNF787, ZNF444, GALP, ZSCAN5B, ZSCAN5A</p> |
| 20 | 4,155,948  | 19,897,944 | 15.74 | <p>SMOX, LOC728228, ADRA1D, PRNP, PRND, PRNT, RASSF2, SLC23A2, C20orf30, PCNA, PCNA-AS1, CDS2, PROKR2, LOC100507629, LOC643406, LOC149837, GPCPD1, C20orf196, CHGB, TRMT6, MCM8, CRLS1, LRRN4, FERMT1, BMP2, HAO1, TMX4, PLCB1, PLCB4, C20orf103, PAK7, LOC100131208, ANKRD5, SNAF25, MKKS, C20orf94, JAG1, LOC339593, BTBD3, SPTLC3, ISM1, LOC100505536, TASP1, ESF1, C20orf7, SEL1L2, FLRT3, MACROD2-AS1, MACROD2, SNRPB2, OTOR, PCSK2, Bfsp1, DSTN, RRPB1, BANF2, SNX5, SNORD17, C20orf72, OVOL2, PET117, CSR2BP, ZNF133, DZANK1-AS1, DZANK1, POLR3F, MIR3192, RBBP9, SEC23B, LINC00493, DTD1, HSPC072, LOC100270804, LOC100128496, C20orf79, SLC24A3, LOC100130264, RIN2</p>                                                                                                                                                                                                                                                                                                                                                                                                                                                                                                                                                                                                                                                                                                                                                                                                                                                                                                                                                                                                                                                                                                                                                                                                                                                                                                                                                                                                                                                                                                                                                                                                                                                                                                                                                                                                                                                                                                                                                                                                                                                                                                                                                                                                                                                                                                                                                                                                                                                                                                                                                                                                                                                                                                                                                                                               |
|    | 47,831,904 | 52,868,496 | 5.04  | <p>DDX27, ZNF1, ZNF1-AS1, SNORD12C, SNORD12B, SNORD12, KCNB1, PTGIS, B4GALT5, SLC9A8, SPATA2, RNF114, SNAI1, UBE2V1, TMEM189-UBE2V1, TMEM189, CEBPB, LOC284751, PTPN1, MIR645, FAM65C, PARD6B, BCAS4, ADNP, DPM1, MOCS3, KCNG1, NFATC2, MIR3194, ATP9A, SALL4, ZFP64, TSH22, ZNF217, SUMO1P1, BCAS1, MIR4756, CYP24A1, PFDN4</p>                                                                                                                                                                                                                                                                                                                                                                                                                                                                                                                                                                                                                                                                                                                                                                                                                                                                                                                                                                                                                                                                                                                                                                                                                                                                                                                                                                                                                                                                                                                                                                                                                                                                                                                                                                                                                                                                                                                                                                                                                                                                                                                                                                                                                                                                                                                                                                                                                                                                                                                                                                                                                                                                                                                                                                                                                                                                                                                                                                                                                                                                                                                                               |

**TABLE S2: Topline statistics on evaluation of 32 wholehuman exomes, including the exomes described in the accompanying paper.**

Statistics are shown for genetic variants grouped by both, novelty (absence from dbSNP132) and filtration status. (See tables on page 2 for legends on abbreviations.)

| <u>CompOverlap</u> |         |         |          |         |               |            |                 |            |             |                |
|--------------------|---------|---------|----------|---------|---------------|------------|-----------------|------------|-------------|----------------|
| CompOverlap        | CompRod | EvalRod | Filter   | Novelty | nEvalVariants | novelSites | nVariantsAtComp | compRate   | nConcordant | concordantRate |
| CompOverlap        | dbSNP   | eval    | called   | all     | 267927        | 76951      | 190976          | 71.2791171 | 188044      | 98.46472855    |
| CompOverlap        | dbSNP   | eval    | called   | known   | 190976        | 0          | 190976          | 100        | 188044      | 98.46472855    |
| CompOverlap        | dbSNP   | eval    | called   | novel   | 76951         | 76951      | 0               | 0          | 0           | 0              |
| CompOverlap        | dbSNP   | eval    | filtered | all     | 86826         | 64593      | 22233           | 25.8063852 | 20514       | 92.2682499     |
| CompOverlap        | dbSNP   | eval    | filtered | known   | 22233         | 0          | 22233           | 100        | 20514       | 92.2682499     |
| CompOverlap        | dbSNP   | eval    | filtered | novel   | 64593         | 64593      | 0               | 0          | 0           | 0              |
| CompOverlap        | dbSNP   | eval    | raw      | all     | 354753        | 141544     | 213209          | 60.1006898 | 208558      | 97.81857239    |
| CompOverlap        | dbSNP   | eval    | raw      | known   | 213209        | 0          | 213209          | 100        | 208558      | 97.81857239    |
| CompOverlap        | dbSNP   | eval    | raw      | novel   | 141544        | 141544     | 0               | 0          | 0           | 0              |

  

| <u>CountVariants</u> |         |         |          |         |                |             |          |              |             |                  |        |      |             |            |          |        |          |         |         |         |             |             |               |                     |             |                |                |                        |
|----------------------|---------|---------|----------|---------|----------------|-------------|----------|--------------|-------------|------------------|--------|------|-------------|------------|----------|--------|----------|---------|---------|---------|-------------|-------------|---------------|---------------------|-------------|----------------|----------------|------------------------|
| CountVariants        | CompRod | EvalRod | Filter   | Novelty | nProcessedLoci | nCalledLoci | nRefLoci | nVariantLoci | variantRate | variantRatePerBp | nSNPs  | nMNs | nInsertions | nDeletions | nComplex | nMixed | nNoCalls | nHets   | nHomRef | nHomVar | nSingletons | nHomozygous | nHeterozygous | heterozygosityPerBp | hetHomRatio | indelRatePerBp | indelRateRatio | deletionInsertionRatio |
| CountVariants        | dbSNP   | eval    | called   | all     | 3101804739     | 267927      | 0        | 267927       | 8.64E-05    | 11577            | 235409 | 0    | 14766       | 17752      | 0        | 0      | 62270    | 1553758 | 5901022 | 1056614 | 79063       | 0           | 0.000501      | 1996                | 1.470507    | 1.05E-05       | 95387          | 1.202221               |
| CountVariants        | dbSNP   | eval    | called   | known   | 3101804739     | 190976      | 0        | 190976       | 6.16E-05    | 16241            | 178423 | 0    | 5556        | 6997       | 0        | 0      | 42236    | 1328752 | 3753984 | 986260  | 30485       | 0           | 0.000428      | 2334                | 1.347263    | 4.05E-06       | 247096         | 1.259359               |
| CountVariants        | dbSNP   | eval    | called   | novel   | 3101804739     | 76951       | 0        | 76951        | 2.48E-05    | 40308            | 56986  | 0    | 9210        | 10755      | 0        | 0      | 20034    | 225006  | 2147038 | 70354   | 48578       | 0           | 7.25E-05      | 13785               | 3.198198    | 6.44E-06       | 155362         | 1.167752               |
| CountVariants        | dbSNP   | eval    | filtered | all     | 3101804739     | 86826       | 0        | 86826        | 2.8E-05     | 35724            | 60496  | 0    | 14042       | 12288      | 0        | 0      | 82831    | 772901  | 1836747 | 85953   | 17179       | 0           | 0.000249      | 4013                | 8.992135    | 8.49E-06       | 117804         | 0.875089               |
| CountVariants        | dbSNP   | eval    | filtered | known   | 3101804739     | 22233       | 0        | 22233        | 7.17E-06    | 139513           | 19176  | 0    | 1054        | 2003       | 0        | 0      | 14140    | 260374  | 375571  | 61371   | 1873        | 0           | 8.39E-05      | 11912               | 4.242623    | 9.9E-07        | 1014656        | 1.90038                |
| CountVariants        | dbSNP   | eval    | filtered | novel   | 3101804739     | 64593       | 0        | 64593        | 2.08E-05    | 48020            | 41320  | 0    | 12988       | 10285      | 0        | 0      | 68691    | 512527  | 1461176 | 24582   | 15306       | 0           | 0.000165      | 6051                | 20.84969    | 7.5E-06        | 133279         | 0.791885               |
| CountVariants        | dbSNP   | eval    | raw      | all     | 3101804739     | 354753      | 0        | 354753       | 0.000114    | 8743             | 295905 | 0    | 28808       | 30040      | 0        | 0      | 145101   | 2326659 | 7737769 | 1142567 | 96242       | 0           | 0.000075      | 1333                | 2.036344    | 1.9E-05        | 52708          | 1.042766               |
| CountVariants        | dbSNP   | eval    | raw      | known   | 3101804739     | 213209      | 0        | 213209       | 6.87E-05    | 14548            | 197599 | 0    | 6610        | 9000       | 0        | 0      | 56376    | 1589126 | 4129555 | 1047631 | 32358       | 0           | 0.000512      | 1951                | 1.516876    | 5.03E-06       | 198706         | 1.361573               |
| CountVariants        | dbSNP   | eval    | raw      | novel   | 3101804739     | 141544      | 0        | 141544       | 4.56E-05    | 21914            | 98306  | 0    | 22198       | 21040      | 0        | 0      | 88725    | 737533  | 3608214 | 94936   | 63884       | 0           | 0.000238      | 4205                | 7.768739    | 1.39E-05       | 71737          | 0.947833               |

  

| <u>TiTvVariantEvaluator</u> |         |         |          |         |        |       |            |           |           |                   |           |           |                  |
|-----------------------------|---------|---------|----------|---------|--------|-------|------------|-----------|-----------|-------------------|-----------|-----------|------------------|
| TiTvVariantEvaluator        | CompRod | EvalRod | Filter   | Novelty | nTi    | nTv   | tiTvRatio  | nTilnComp | nTvlnComp | TiTvRatioStandard | nTiDerive | nTvDerive | tiTvDerivedRatio |
| TiTvVariantEvaluator        | dbSNP   | eval    | called   | all     | 168111 | 67298 | 2.49800886 | 128769    | 52921     | 2.43323066        | 0         | 0         | 0                |
| TiTvVariantEvaluator        | dbSNP   | eval    | called   | known   | 127923 | 50500 | 2.53312871 | 127746    | 51671     | 2.47229587        | 0         | 0         | 0                |
| TiTvVariantEvaluator        | dbSNP   | eval    | called   | novel   | 40188  | 16798 | 2.39242767 | 1023      | 1250      | 0.8184            | 0         | 0         | 0                |
| TiTvVariantEvaluator        | dbSNP   | eval    | filtered | all     | 31482  | 29014 | 1.08506238 | 12736     | 9367      | 1.35966692        | 0         | 0         | 0                |
| TiTvVariantEvaluator        | dbSNP   | eval    | filtered | known   | 11274  | 7902  | 1.42672741 | 11683     | 8066      | 1.44842549        | 0         | 0         | 0                |
| TiTvVariantEvaluator        | dbSNP   | eval    | filtered | novel   | 20208  | 21112 | 0.95718075 | 1053      | 1301      | 0.8093774         | 0         | 0         | 0                |
| TiTvVariantEvaluator        | dbSNP   | eval    | raw      | all     | 199593 | 96312 | 2.07235858 | 1480263   | 8700435   | 1.70130149        | 0         | 0         | 0                |
| TiTvVariantEvaluator        | dbSNP   | eval    | raw      | known   | 139197 | 58402 | 2.38342865 | 139429    | 59737     | 2.33404758        | 0         | 0         | 0                |
| TiTvVariantEvaluator        | dbSNP   | eval    | raw      | novel   | 60396  | 37910 | 1.59314165 | 14662634  | 8640698   | 1.69692703        | 0         | 0         | 0                |

## LEGENDS TO ABBREVIATIONS

### 1) CompOverlap : The overlap between eval and comp sites column descriptions:

|                 |                                                                                                                                                             |
|-----------------|-------------------------------------------------------------------------------------------------------------------------------------------------------------|
| nEvalSNPs       | number of eval SNP sites                                                                                                                                    |
| nCompSNPs       | number of comp SNP sites                                                                                                                                    |
| novelSites      | number of eval sites outside of comp sites                                                                                                                  |
| nVariantsAtComp | number of eval sites at comp sites (that is, sharing the same locus as a variant in the comp track, regardless of whether the alternate allele is the same) |
| compRate        | percentage of eval sites at comp sites                                                                                                                      |
| nConcordant     | number of concordant sites (that is, for the sites that share the same locus as a variant in the comp track, those that have the same alternate allele)     |
| concordantRate  | the concordance rate                                                                                                                                        |

### 3) TiTvVariantEvaluator : Ti/Tv (Transition/Transversion) Variant Evaluator column descriptions:

|                   |                                                     |
|-------------------|-----------------------------------------------------|
| nTi               | number of transition loci                           |
| nTv               | number of transversion loci                         |
| tiTvRatio         | the transition to transversion ratio                |
| nTiInComp         | number of comp transition sites                     |
| nTvInComp         | number of comp transversion sites                   |
| TiTvRatioStandard | the transition to transversion ratio for comp sites |

### 2) CountVariants : Counts different classes of variants in the sample column descriptions:

|                        |                                               |
|------------------------|-----------------------------------------------|
| nProcessedLoci         | Number of processed loci                      |
| nCalledLoci            | Number of called loci                         |
| nRefLoci               | Number of reference loci                      |
| nVariantLoci           | Number of variant loci                        |
| variantRate            | Variants per loci rate                        |
| variantRatePerBp       | Number of variants per base                   |
| nSNPs                  | Number of snp loci                            |
| nInsertions            | Number of insertion                           |
| nDeletions             | Number of deletions                           |
| nComplex               | Number of complex loci                        |
| nNoCalls               | Number of no calls loci                       |
| nHets                  | Number of het loci                            |
| nHomRef                | Number of hom ref loci                        |
| nHomVar                | Number of hom var loci                        |
| nSingletons            | Number of singletons                          |
| heterozygosity         | heterozygosity per locus rate                 |
| heterozygosityPerBp    | heterozygosity per base pair                  |
| hetHomRatio            | heterozygosity to homozygosity ratio          |
| indelRate              | indel rate (insertion count + deletion count) |
| indelRatePerBp         | indel rate per base pair                      |
| deletionInsertionRatio | deletion to insertion ratio                   |
